# Supplementary figures and images for: A new simple Schiff base fluorescence “on” sensor for Al3+ and its living cell imaging
Source: Royal Society of Chemistry journal article supplement (doi:10.1039/c4dt03932g), 2015-01-01

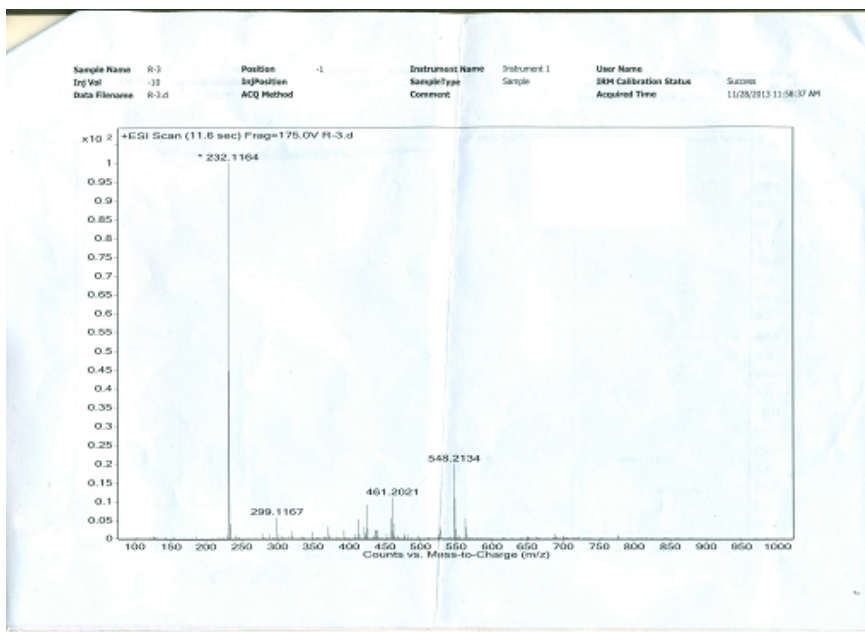

HRMS of L

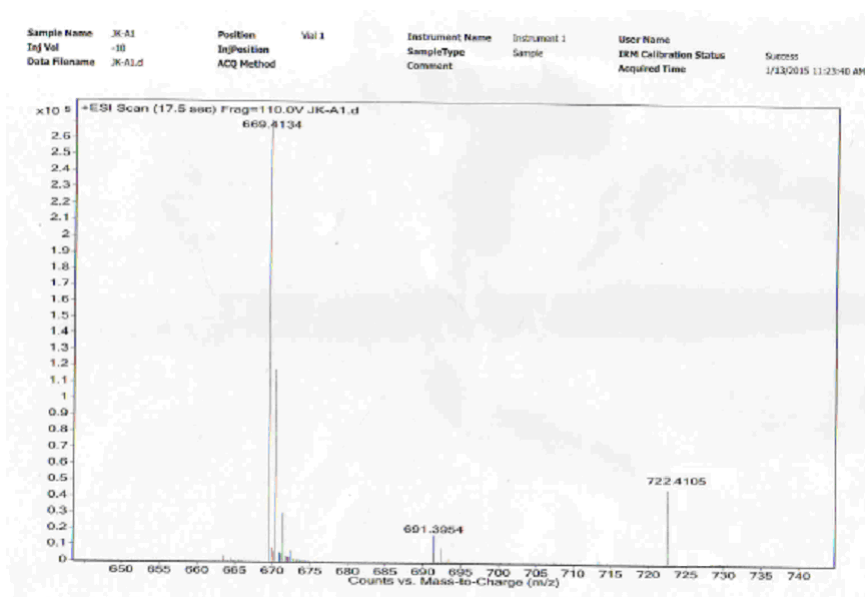

HRMS of Al<sup>3+</sup>:3L complex

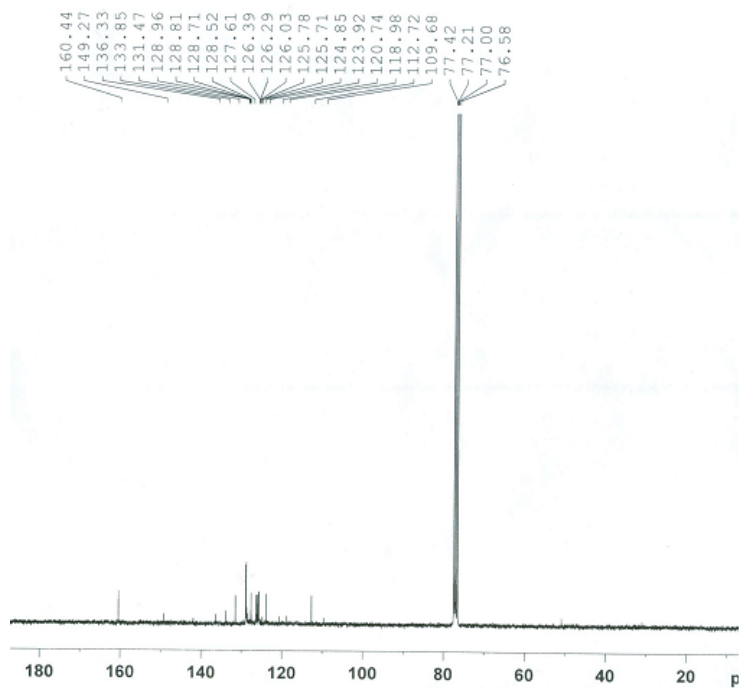

$^{13}\text{C}$  NMR of **L**

Supplement: c4dt03932g1.pdf [file c4dt03932g1.pdf]
